# Supplementary material for: Academic Procrastination in Clinical-Year Medical Students: A PASS Scale Analysis
Source: Research Square preprint supplement (doi:10.21203/rs.3.rs-7166555/v1), 2025-09-05
Supplement: Supplementary file 1 [file 928bcf1659de9d4f46d20098.xlsx]

## Sheet: Sheet1
A	Gender	Age	Class	b	c	d	e	f	g	h	i	j	k	l	m	n	o	p	q	r	s	t	u	v	w	x	y	z	aa	bb	cc	dd	ee	ff	gg	hh	ii	jj
Yes	female	25	5th	5	4	5	5	4	5	5	4	5	3	4	5	2	4	2	3	5	3	4	3	3	4	1	2	3	4	3	4	2	4	2	4	4	4	1
Yes	female	23	5th	4	3	1	5	3	1	1	2	2	3	5	1	5	2	4	2	4	2	4	2	4	2	4	2	4	3	3	3	3	3	5	3	2	4	3
Yes	female	22	5th	5	4	4	5	5	1	4	4	4	1	1	2	2	1	1	2	2	4	3	1	1	2	1	1	3	4	1	3	2	1	1	3	1	5	2
Yes	female	24	5th	5	5	5	5	5	5	5	5	5	3	1	5	4	4	5	2	5	4	4	4	4	5	1	4	5	5	2	3	3	2	2	4	3	5	4
Yes	female	24	5th	1	4	2	2	1	2	2	1	2	3	3	2	2	2	2	2	2	2	2	2	2	2	2	2	2	2	2	2	2	1	1	2	1	2	1
Yes	female	23	5th	3	3	5	5	3	3	2	4	5	2	1	5	4	2	3	2	5	5	5	1	4	1	1	1	3	4	3	1	1	4	3	5	5	5	1
Yes	Male	22	5th	5	5	3	5	5	3	5	5	5	4	4	5	5	5	4	3	5	5	5	5	1	5	1	1	2	3	1	3	3	3	1	1	5	5	2
Yes	female	23	5th	4	5	2	5	5	1	5	5	1	4	4	5	5	5	5	4	5	5	5	5	1	2	1	5	4	5	1	4	3	5	1	5	5	4	1
Yes	female	24	5th	4	5	2	4	5	2	5	5	1	4	4	5	2	4	5	5	5	5	2	5	1	4	1	4	5	2	1	4	2	5	3	3	5	5	1
Yes	female	23	5th	3	5	4	4	4	4	4	4	4	1	1	4	4	1	1	1	2	3	4	2	1	1	1	1	2	2	1	4	2	3	1	1	1	2	1
Yes	female	23	5th	4	4	4	4	4	3	4	4	3	1	5	5	5	4	5	2	5	4	4	1	5	4	2	4	5	4	1	1	4	5	1	3	5	5	5
Yes	Male	22	5th	4	3	1	5	3	2	5	3	5	1	2	5	4	3	3	4	3	3	4	4	3	5	3	3	5	3	4	2	3	3	4	1	4	4	2
Yes	Male	24	5th	2	2	2	1	1	1	2	2	2	1	1	1	5	5	5	5	5	5	5	5	5	5	5	5	5	5	5	5	5	4	5	5	5	5	5
Yes	Male	24	5th	3	3	2	2	2	1	2	3	5	2	2	3	4	2	3	4	2	2	4	2	3	3	4	2	2	3	4	5	5	1	2	2	3	2	4
Yes	female	22	5th	5	5	5	3	3	3	3	3	3	3	3	3	3	3	4	4	4	4	3	3	3	4	3	3	3	3	3	3	3	3	3	3	3	3	3
Yes	female	23	4th	5	3	1	5	3	2	4	3	1	1	1	1	2	2	2	1	2	2	2	2	3	2	1	2	2	2	1	2	2	2	2	2	2	2	1
Yes	Male	24	5th	3	3	4	4	4	4	3	4	4	2	2	3	2	2	1	2	4	2	4	3	1	2	2	1	2	4	1	1	2	4	1	4	1	2	1
Yes	female	23	5th	5	5	5	5	5	5	5	5	5	1	1	1	5	4	1	1	1	1	1	1	1	1	1	1	1	1	1	1	1	1	5	4	4	1	1
Yes	female	23	5th	4	4	5	5	5	5	5	5	5	3	4	5	3	5	2	5	5	5	5	3	3	5	2	5	4	5	2	5	3	5	2	5	2	5	1
Yes	female	22	4th	4	2	2	4	5	1	5	3	1	4	1	4	3	3	3	1	5	1	4	4	5	3	1	1	4	2	2	1	1	4	1	4	5	2	1
Yes	female	22	4th	4	4	5	3	4	4	2	2	2	2	1	3	2	2	2	2	3	1	2	1	1	3	1	2	1	2	1	1	1	3	1	2	1	1	1
Yes	female	23	4th	4	5	5	5	5	5	3	4	5	2	3	4	4	3	3	2	3	4	3	3	3	5	1	2	3	4	4	4	5	3	2	2	2	3	2
Yes	Male	23	5th	5	4	1	5	5	5	5	5	5	5	5	5	2	5	5	2	5	3	5	5	1	5	1	5	5	5	1	1	5	5	1	5	5	2	1
Yes	female	24	5th	4	5	5	4	5	5	4	5	5	1	2	4	2	1	1	1	2	1	2	2	3	4	1	2	2	3	1	3	2	2	1	1	3	2	1
Yes	female	24	5th	3	3	4	4	4	5	3	3	5	4	3	4	4	4	3	3	4	4	4	3	2	4	3	3	3	4	2	3	4	3	3	3	3	3	3
Yes	female	24	5th	4	5	5	2	4	5	3	3	4	4	3	5	4	4	3	5	3	3	4	4	4	3	3	5	4	3	4	2	4	4	3	3	3	3	3
Yes	Male	24	5th	1	1	1	1	1	1	2	2	2	1	1	1	1	1	1	1	1	1	1	1	1	1	1	1	1	1	1	1	1	1	1	1	1	1	1
Yes	female	23	5th	2	4	1	4	5	1	2	3	1	1	1	1	2	2	2	1	1	2	2	1	1	1	1	1	1	1	1	1	2	1	1	1	1	1	1
Yes	female	24	5th	5	5	5	5	5	5	5	5	5	2	4	5	5	5	5	5	5	5	5	5	5	2	1	4	5	5	4	1	5	4	1	1	1	3	3
Yes	female	24	5th	3	3	1	5	3	4	5	3	4	3	3	3	3	3	3	3	3	3	3	3	3	3	3	3	3	3	3	3	3	3	3	3	3	3	3
Yes	female	23	5th	2	2	1	5	4	2	1	1	1	1	3	4	4	4	1	4	4	3	4	5	1	1	1	1	4	2	1	1	1	1	1	1	1	2	3
Yes	female	23	5th	4	4	5	5	5	5	4	5	5	4	1	5	2	5	3	1	5	4	4	5	1	4	1	4	4	4	1	3	5	5	1	3	4	4	1
Yes	female	24	5th	3	4	4	4	5	5	2	3	3	4	3	5	3	5	5	4	5	5	5	5	1	5	1	5	3	5	1	4	3	1	3	5	5	3	1
Yes	female	24	5th	3	3	4	3	4	4	2	3	3	3	3	3	4	3	4	3	4	2	4	1	3	4	3	2	3	3	4	3	2	3	3	4	2	3	2
Yes	female	23	5th	5	5	5	5	5	5	5	5	5	2	3	4	5	4	4	5	2	5	5	4	2	5	2	5	3	5	2	2	5	5	4	4	5	4	3
Yes	Male	23	4th	4	5	5	4	5	5	4	5	5	1	1	1	2	1	1	1	1	1	3	1	1	1	1	4	4	1	1	1	1	1	1	1	3	1	1
Yes	female	22	5th	3	3	5	5	5	5	4	4	5	1	1	5	4	2	1	2	5	5	5	5	3	3	1	3	5	5	3	4	1	3	1	5	5	5	1
Yes	female	21	4th	4	4	3	5	4	3	4	4	1	1	1	1	5	1	1	5	5	5	4	1	1	3	1	3	4	4	1	5	5	5	5	1	5	5	1
Yes	female	22	4th	4	4	5	4	4	4	3	3	4	3	1	4	4	4	4	1	4	4	4	2	1	4	1	1	4	3	1	1	3	3	1	4	2	4	1
Yes	female	25	5th	5	4	5	5	5	5	5	5	5	3	3	3	4	1	3	5	3	5	4	3	3	3	1	1	3	4	3	3	5	4	3	3	5	5	3
Yes	female	23	5th	4	4	1	4	4	1	4	4	1	2	2	4	4	4	5	4	4	2	4	3	2	3	1	4	4	2	1	2	1	4	2	4	4	4	1
Yes	female	24	5th	4	4	1	5	5	1	3	4	1	2	2	4	4	1	4	1	4	3	3	3	1	1	1	3	2	4	2	3	2	2	3	4	1	3	3
Yes	female	24	5th	2	2	2	2	2	1	2	2	2	3	4	4	4	4	2	2	4	4	4	3	3	2	2	3	4	4	3	4	3	3	4	3	3	3	4
Yes	female	23	4th	5	4	1	4	5	1	3	2	1	1	2	4	5	3	4	3	4	4	5	4	4	5	2	4	5	3	5	2	1	3	1	3	3	5	3
Yes	female	22	5th	4	5	4	5	4	4	4	4	4	3	1	5	5	1	3	3	5	1	5	5	1	1	3	5	4	3	1	1	4	5	3	5	5	3	1
Yes	female	22	5th	5	4	1	4	5	5	4	4	4	3	3	3	3	3	3	3	3	3	3	3	3	3	3	3	3	3	3	3	3	3	3	3	3	3	3
Yes	female	29	5th	3	4	4	5	3	2	5	5	5	5	1	5	5	1	5	3	3	5	2	1	1	5	1	1	4	4	1	1	1	5	1	1	4	5	1
Yes	female	24	5th	1	3	1	5	4	4	3	3	3	3	1	4	3	4	1	1	3	5	5	3	1	5	1	4	1	4	1	3	1	2	1	5	4	1	1
Yes	female	24	5th	4	3	4	5	4	4	5	4	4	3	5	5	1	3	4	5	5	5	5	5	5	4	1	1	5	5	5	5	1	5	5	5	5	4	1
Yes	female	25	5th	2	2	5	5	5	5	4	4	4	1	1	4	3	1	5	2	4	5	5	5	1	5	1	5	5	5	1	5	1	5	1	3	5	2	2
Yes	female	23	4th	3	3	1	3	3	1	3	1	1	2	3	3	5	2	4	2	2	5	3	1	2	2	3	2	2	2	2	3	3	2	2	2	3	5	1
Yes	female	23	5th	5	5	5	5	5	5	4	3	3	3	2	3	4	2	3	3	4	3	3	4	1	1	1	1	5	4	1	1	5	4	4	4	1	4	1
Yes	female	23	5th	5	4	5	4	4	4	4	4	4	4	4	4	3	2	3	2	4	4	4	2	3	3	3	3	3	3	4	4	2	2	2	2	4	3	3
Yes	female	23	5th	4	3	2	4	4	2	5	3	1	1	4	5	3	5	3	3	5	5	5	5	2	2	1	1	5	5	1	1	5	3	1	1	5	1	1
Yes	Male	23	5th	5	5	5	5	5	5	5	5	5	3	5	5	3	5	4	4	5	3	3	5	3	3	4	4	3	3	4	4	4	4	5	4	3	5	3
Yes	female	22	4th	2	3	2	4	3	2	2	5	2	3	3	4	5	3	5	3	5	3	3	4	1	2	3	5	4	4	1	3	1	3	2	4	5	4	1
Yes	female	23	5th	5	5	5	5	5	5	5	5	5	4	1	5	3	5	3	1	5	5	5	3	1	4	1	4	5	5	1	3	5	5	1	4	5	5	1
Yes	female	23	4th	4	4	4	4	4	4	4	4	4	3	2	3	3	3	3	3	3	3	4	4	2	3	3	3	3	4	2	3	3	4	3	3	4	3	3
Yes	female	22	5th	4	4	4	5	5	5	3	3	3	5	1	5	5	5	5	1	2	1	5	3	3	5	1	5	5	2	1	3	1	5	1	2	5	3	1
Yes	female	24	5th	4	4	4	5	3	4	3	4	4	2	1	5	4	3	5	4	4	4	5	3	5	4	2	4	5	4	1	4	1	5	4	4	5	3	4
Yes	Male	22	5th	5	3	3	5	1	1	5	5	5	1	1	1	1	1	2	4	3	5	5	5	4	4	5	1	5	5	5	1	5	5	1	1	1	5	1
Yes	Male	24	5th	4	4	5	4	4	4	4	4	4	3	1	5	4	5	1	3	2	4	4	4	2	4	3	3	3	3	3	3	3	3	3	3	3	3	3
Yes	Male	23	5th	3	3	2	4	4	2	4	4	3	5	1	5	5	5	5	5	5	5	5	5	4	5	3	1	5	5	5	3	5	3	3	3	5	5	1
Yes	female	24	5th	3	3	1	4	1	1	3	3	2	3	5	4	4	4	5	5	2	3	4	3	3	3	4	1	1	3	1	1	4	4	4	4	5	3	2
Yes	female	23	5th	4	4	4	4	4	4	5	5	5	5	5	5	5	5	5	5	5	5	5	5	5	5	5	5	5	5	5	5	5	5	5	5	5	5	5
Yes	female	24	5th	3	5	1	5	5	5	5	5	5	3	5	5	1	3	1	5	4	5	5	1	5	2	1	4	4	5	1	4	5	5	3	4	5	5	1
Yes	Male	23	5th	4	5	5	5	5	5	5	5	5	4	1	3	1	4	3	3	5	3	3	3	1	1	1	4	5	4	1	1	4	1	1	1	1	2	1
Yes	female	23	5th	5	5	5	5	4	4	5	5	5	1	4	5	1	5	5	3	5	4	4	4	2	5	1	5	5	4	1	1	1	5	1	2	4	2	1
Yes	female	24	5th	5	5	1	5	5	1	5	5	1	5	3	3	1	2	4	3	4	5	3	2	5	3	1	2	3	4	5	1	2	2	1	3	2	4	3
Yes	female	22	5th	5	5	1	5	5	5	5	5	5	1	1	4	5	1	1	1	5	1	4	1	4	1	1	2	4	1	4	1	1	5	1	4	5	4	1
Yes	female	23	5th	2	1	1	3	3	5	1	1	1	2	1	1	5	4	1	3	2	1	5	4	1	5	1	1	2	4	1	1	3	4	3	3	5	5	1
Yes	female	23	5th	4	3	4	5	4	5	5	5	5	5	5	5	3	5	3	5	5	3	5	5	3	4	3	4	4	4	4	4	4	3	3	3	3	4	3
Yes	female	22	4th	2	2	2	3	3	3	2	2	2	2	1	2	3	2	2	2	2	2	2	2	1	3	1	2	2	1	1	2	2	2	1	2	2	1	1
Yes	female	23	5th	4	5	5	5	5	4	4	5	5	5	3	5	3	4	3	3	5	4	5	5	1	1	1	1	3	4	1	1	3	4	1	1	4	3	1
Yes	Male	23	5th	3	3	3	4	4	4	5	5	3	3	3	4	3	3	2	3	4	5	3	3	4	4	3	2	3	3	2	5	4	4	4	3	2	5	3
Yes	female	24	5th	2	3	5	4	4	5	3	4	5	4	1	3	4	3	2	3	2	2	2	2	2	3	3	2	2	2	1	2	2	2	2	2	2	3	1
Yes	female	22	4th	3	3	5	4	4	5	3	3	5	1	4	5	4	4	4	5	5	5	5	2	1	5	1	3	4	4	1	1	5	5	3	3	5	1	1
Yes	female	23	5th	5	5	5	5	5	5	5	5	5	1	1	3	2	1	1	1	1	1	1	1	3	1	1	1	1	1	1	1	1	1	1	1	1	5	1
Yes	female	23	5th	4	4	4	5	4	3	3	2	4	1	1	4	5	1	2	1	2	4	5	4	1	4	1	5	5	5	1	4	1	3	1	5	1	5	1
Yes	female	23	4th	4	4	1	4	5	1	1	1	3	3	1	2	3	3	2	1	3	1	2	4	1	3	1	2	2	1	1	1	2	4	1	1	4	1	1
Yes	female	22	4th	3	4	5	4	5	5	5	5	5	3	3	5	4	4	2	5	4	5	5	4	3	5	1	5	4	5	4	4	5	5	5	5	5	3	1
Yes	female	24	5th	2	3	2	3	4	3	4	3	3	3	4	4	2	4	4	2	4	3	3	4	4	5	1	4	3	4	2	1	1	3	2	4	5	4	3
Yes	female	23	4th	4	5	5	4	5	5	4	3	3	2	1	4	4	4	5	4	4	2	4	4	3	5	1	1	1	1	1	1	3	4	1	3	5	3	1
Yes	female	23	5th	4	4	5	4	4	5	5	4	5	1	1	4	2	4	1	4	4	5	5	4	2	4	1	3	5	5	1	4	2	1	1	1	1	4	1
Yes	Male	23	5th	2	2	4	4	4	4	5	5	4	1	4	3	3	4	3	2	5	4	4	4	3	2	4	2	4	2	3	3	3	2	3	3	4	3	2
Yes	Male	23	5th	3	4	4	4	3	4	5	5	4	1	1	1	4	2	1	5	2	5	3	1	3	3	1	1	4	4	2	3	5	5	1	2	2	5	4
Yes	Male	24	5th	1	1	2	2	2	2	2	2	1	3	3	3	5	2	5	4	4	4	2	4	4	3	3	4	2	2	3	2	4	3	3	3	3	3	1
Yes	female	23	5th	4	4	2	5	4	2	4	4	2	4	3	5	5	5	4	2	5	5	5	5	2	3	2	5	3	4	1	1	5	5	2	3	2	2	2
Yes	Male	24	5th	3	2	1	4	2	1	1	1	1	3	1	3	5	1	3	1	3	1	1	3	1	1	1	1	1	1	1	1	1	2	1	1	1	1	1
Yes	female	23	5th	4	3	1	5	4	1	3	3	1	1	1	5	5	5	3	4	5	5	5	4	1	5	3	5	4	4	1	1	5	5	5	5	3	1	1
Yes	Male	24	5th	2	3	4	4	4	4	4	3	3	2	2	4	3	3	2	2	3	2	3	2	2	2	2	1	2	4	2	3	2	2	1	4	2	4	1
Yes	female	23	5th	5	5	5	2	2	2	5	5	5	5	5	5	5	5	5	5	5	5	5	5	5	5	5	5	5	5	5	5	5	5	5	5	5	5	5
Yes	female	23	5th	4	5	4	5	4	4	5	4	4	3	2	4	4	4	4	3	4	3	2	1	1	3	1	4	5	4	1	1	1	4	1	2	3	2	1
Yes	female	23	5th	3	3	1	5	5	1	3	3	1	1	1	3	2	4	1	4	4	3	4	1	1	3	1	4	5	4	1	1	4	4	4	1	1	1	1
Yes	female	23	5th	3	3	3	4	4	4	2	2	4	3	2	3	3	2	4	3	3	3	3	3	3	3	2	3	4	4	1	3	3	3	2	2	3	3	2
Yes	female	25	5th	5	5	5	5	4	5	5	5	5	4	2	5	1	4	4	1	5	4	4	4	1	4	1	4	4	2	1	1	1	4	1	2	4	4	1
Yes	Male	23	5th	5	5	5	5	4	5	5	5	5	3	1	3	1	2	4	3	2	3	3	2	1	1	4	4	5	5	1	5	4	3	2	2	2	5	1
Yes	Male	23	5th	5	5	5	5	5	5	5	5	5	1	1	1	1	1	1	1	1	1	1	1	1	1	2	1	1	1	1	1	1	1	2	3	3	2	2
Yes	Male	24	5th	4	4	3	4	4	3	4	4	4	4	1	5	5	5	1	5	5	5	5	1	5	5	1	1	5	5	5	1	5	4	1	5	5	5	1
Yes	Male	24	5th	4	4	5	5	3	2	3	4	5	3	3	5	4	4	3	3	3	3	3	4	3	1	1	3	3	3	1	1	5	3	1	3	1	3	1
Yes	female	21	5th	3	3	3	3	3	3	3	3	3	3	3	3	3	3	3	3	3	3	3	3	3	3	3	3	3	3	3	3	3	3	3	3	3	3	3
Yes	Male	23	5th	1	2	1	2	1	2	1	1	1	3	5	2	2	1	1	3	2	2	5	2	2	3	2	4	2	3	2	5	2	1	2	3	3	1	5
Yes	female	24	5th	1	1	2	1	1	1	1	1	1	3	3	3	3	3	3	3	3	3	3	3	3	3	3	3	3	3	3	3	3	3	3	3	3	3	3
Yes	Male	23	4th	4	5	5	4	5	5	5	5	5	1	1	4	5	2	4	1	5	4	5	4	3	4	1	5	5	5	1	4	4	4	1	2	4	4	1
Yes	Male	22	4th	2	5	1	4	3	1	3	3	3	2	3	2	4	1	1	1	1	2	2	2	3	3	1	2	3	3	2	3	1	2	1	2	1	4	4
Yes	Male	23	4th	4	5	1	4	4	2	1	1	1	3	3	4	1	4	4	2	2	2	1	3	1	2	1	1	3	3	2	5	5	3	1	3	2	3	4
Yes	female	22	4th	3	3	1	3	3	1	2	4	1	2	1	5	5	3	2	1	5	5	4	1	1	5	1	2	2	2	1	2	2	2	1	5	2	3	1
Yes	female	21	4th	1	2	1	2	1	2	1	1	2	2	4	2	3	1	2	3	2	2	2	1	2	2	1	1	1	3	1	2	2	2	1	3	2	1	2
Yes	female	23	4th	4	5	2	5	3	2	5	4	2	4	1	4	4	2	1	5	3	5	5	4	1	5	1	1	5	4	1	4	5	2	1	3	3	5	2
Yes	female	22	4th	5	5	3	5	5	5	5	5	5	1	1	1	2	1	1	1	1	3	4	1	2	1	1	1	5	4	1	3	3	2	1	1	1	5	1
Yes	female	23	5th	3	4	5	4	4	4	2	2	2	3	2	4	4	2	3	3	2	2	3	3	3	3	2	2	2	4	3	3	3	3	2	2	4	3	2
Yes	female	22	4th	3	3	5	3	4	5	4	5	5	1	1	4	3	3	1	1	2	3	3	4	1	2	1	1	1	3	2	1	1	2	1	2	1	1	1
Yes	female	21	4th	4	5	5	5	5	5	3	2	5	4	1	2	1	2	4	1	5	4	5	4	1	5	5	5	5	5	1	4	1	5	4	4	4	4	1
Yes	female	22	4th	3	1	1	3	3	3	1	1	1	2	3	2	3	3	3	1	3	3	3	2	3	1	2	3	4	3	2	3	2	2	3	3	3	3	2
Yes	female	21	4th	3	3	1	5	3	4	5	5	1	2	1	5	5	5	2	1	5	5	5	4	1	5	1	2	5	5	1	2	1	2	1	3	3	5	2
Yes	Male	22	4th	5	4	3	5	4	3	5	2	3	3	2	2	5	2	1	2	2	2	3	2	5	2	1	1	5	5	5	5	5	1	1	3	2	5	4
Yes	Male	23	4th	2	2	2	2	2	2	2	2	2	5	5	4	4	4	4	4	4	4	4	4	4	4	4	4	4	4	4	4	4	4	4	4	4	4	4
Yes	Male	23	4th	3	4	5	5	5	5	5	5	5	1	4	3	5	2	2	2	1	5	1	1	4	5	1	1	3	4	4	4	4	1	1	3	1	5	1
Yes	female	22	4th	4	4	1	4	4	1	5	5	3	1	1	3	1	1	1	1	2	5	5	5	1	2	1	1	5	3	1	1	1	1	1	3	3	1	1
Yes	female	23	5th	3	3	3	4	4	4	3	3	3	3	3	3	3	4	4	3	4	2	3	3	1	3	3	3	2	3	1	1	2	4	1	4	4	2	1
Yes	Male	23	5th	3	4	5	1	2	2	4	3	4	1	1	4	1	5	4	4	4	1	4	1	1	4	4	1	3	3	1	1	3	4	1	4	4	3	1
Yes	Male	21	4th	1	1	1	4	2	2	5	3	5	3	4	3	2	5	5	3	4	4	3	2	1	1	4	2	5	2	5	4	3	5	2	5	1	5	1
Yes	female	21	4th	2	2	5	4	3	4	4	5	5	2	2	5	5	1	1	3	5	3	4	2	1	5	1	1	4	4	1	2	1	4	1	1	4	2	2
Yes	Male	23	4th	4	4	4	5	3	3	4	4	4	2	1	1	1	1	1	1	5	5	1	1	1	1	1	4	5	5	3	4	2	3	1	1	1	5	1
Yes	Male	21	4th	5	5	5	5	1	3	5	5	5	3	5	5	5	2	4	5	4	5	2	5	5	3	1	1	4	5	1	1	4	5	5	5	4	5	4
Yes	female	22	4th	3	4	5	3	3	5	2	2	5	4	5	3	5	3	3	3	3	3	3	3	3	3	3	3	3	3	3	3	3	3	3	3	3	3	3
Yes	Male	22	4th	3	4	5	5	5	5	3	4	5	2	2	4	5	2	3	1	5	4	4	4	2	5	1	5	5	2	1	4	4	4	2	4	2	5	3
Yes	Male	24	4th	3	4	4	2	4	4	4	3	4	2	4	4	5	4	1	1	4	4	3	4	2	3	2	4	4	4	1	4	1	3	1	3	4	4	3
Yes	female	24	5th	3	4	4	2	4	4	4	3	4	1	4	2	3	1	3	2	2	2	2	2	1	1	2	2	3	3	3	2	1	3	1	3	2	2	3
Yes	Male	23	4th	1	2	1	1	2	3	2	2	2	3	2	3	4	3	4	3	3	4	4	4	3	3	4	3	2	3	3	4	4	4	3	3	3	3	3
Yes	female	22	4th	2	3	5	4	4	1	5	4	1	1	2	3	5	1	1	1	3	3	3	1	2	4	1	2	1	3	1	1	1	3	1	3	3	2	1
Yes	female	21	6th	1	1	1	3	3	3	3	3	3	5	1	4	4	4	5	3	5	4	4	1	2	4	3	3	3	4	1	2	4	4	1	2	4	2	1
Yes	female	22	4th	5	5	3	5	5	5	5	5	5	1	1	2	1	1	1	4	1	5	4	1	1	5	1	1	5	5	1	3	5	1	1	1	1	5	2
Yes	female	21	6th	3	3	4	3	3	4	3	3	4	1	1	5	3	4	1	1	3	1	3	2	4	2	1	1	4	3	1	1	1	1	1	1	4	3	1
Yes	female	24	6th	2	2	2	2	2	2	3	3	4	3	3	3	3	3	3	3	3	3	3	3	3	3	3	3	3	3	3	3	3	3	3	3	3	3	3
Yes	female	24	6th	1	1	1	3	5	5	3	3	3	1	1	5	3	3	1	1	5	3	5	3	1	5	3	3	5	5	1	3	5	5	1	5	5	5	1
Yes	female	22	4th	2	2	1	2	2	2	1	1	1	3	3	4	5	5	5	3	1	1	1	3	4	3	3	2	3	5	3	3	1	2	4	4	4	2	1
Yes	female	27	6th	5	5	5	5	5	5	5	4	5	4	1	5	4	1	5	1	5	5	5	5	1	5	2	5	5	5	1	3	1	5	2	1	5	3	3
Yes	female	25	6th	3	2	3	2	2	3	2	2	2	2	4	3	3	1	1	1	2	5	3	3	3	2	3	5	5	3	3	4	3	3	5	5	5	4	4
Yes	female	23	4th	3	5	5	5	3	3	4	2	4	1	4	4	5	4	1	1	5	4	4	4	1	5	2	4	4	4	1	5	2	2	1	4	1	5	1
Yes	female	25	4th	4	4	4	4	4	4	5	5	4	3	3	3	2	4	4	4	4	4	4	3	3	3	3	2	3	3	3	3	3	3	3	3	3	3	3
Yes	female	21	4th	5	5	5	5	5	5	1	5	1	5	1	5	5	1	5	1	5	5	5	1	1	5	2	5	5	5	1	1	5	5	1	1	5	1	1
Yes	female	21	4th	1	5	5	2	5	5	1	5	1	2	1	3	4	2	3	3	3	5	2	3	3	3	1	2	3	2	3	2	5	4	1	2	4	2	3
Yes	female	22	4th	2	4	1	3	3	2	3	2	1	3	4	4	3	3	4	3	4	4	3	2	1	3	1	2	4	4	1	2	3	4	1	3	4	4	3
Yes	Male	27	6th	3	2	1	5	2	1	3	4	3	3	1	3	3	5	1	4	5	5	5	5	1	4	1	3	2	4	1	1	5	4	1	1	3	2	1
Yes	female	22	4th	3	3	2	3	3	2	3	3	2	3	4	4	5	4	3	2	5	4	4	3	2	3	1	4	4	4	2	4	2	3	2	3	4	4	2
Yes	Male	23	4th	3	4	4	3	3	4	4	5	5	3	4	4	3	2	5	4	3	4	3	4	3	2	2	2	4	4	4	4	2	4	4	4	4	4	3
Yes	female	22	6th	5	4	5	5	5	5	5	5	5	4	1	5	5	5	5	3	5	5	4	1	3	1	1	5	5	5	1	1	1	5	3	4	5	5	1
Yes	Male	24	6th	5	5	1	1	3	2	5	4	5	1	5	2	5	2	5	3	3	3	3	3	3	3	3	4	3	5	1	5	1	5	1	3	3	3	3
Yes	female	22	4th	2	2	2	2	2	2	1	1	2	3	1	4	4	5	4	5	5	4	4	5	1	4	3	1	2	5	4	2	2	5	5	5	5	3	1
Yes	female	22	4th	4	3	2	4	3	2	3	3	3	1	1	1	1	1	1	1	1	3	1	1	1	1	1	1	1	1	1	1	1	1	1	1	1	5	1
Yes	female	23	4th	3	4	4	5	4	4	5	4	4	1	1	1	3	1	5	5	5	5	5	1	1	1	1	5	5	1	1	4	1	1	1	1	1	5	1
Yes	female	22	4th	5	5	1	5	5	1	4	5	1	1	1	1	1	1	1	1	1	2	1	1	1	1	1	1	1	2	3	1	1	1	1	1	1	5	1
Yes	female	22	4th	5	5	5	5	5	5	3	5	5	4	2	4	1	2	5	1	5	5	5	1	5	5	1	5	5	5	3	5	1	4	4	1	4	4	1
Yes	female	22	4th	2	5	5	3	5	5	5	5	5	1	3	3	3	2	4	2	4	2	3	4	2	3	3	3	4	2	3	3	3	3	3	3	4	2	3
Yes	female	24	4th	3	3	3	3	3	3	3	3	3	3	1	4	5	4	3	3	4	4	3	3	1	3	1	2	3	3	1	1	4	5	3	1	4	2	1
Yes	female	22	4th	2	1	2	2	2	2	2	3	2	3	3	3	3	3	3	3	3	1	1	1	5	5	3	3	5	3	5	3	3	1	5	3	1	3	3
Yes	female	24	4th	4	4	5	5	5	5	5	5	5	2	2	4	3	3	2	3	5	3	2	4	2	4	1	4	4	4	2	2	2	4	2	2	4	3	1
Yes	female	24	4th	3	4	5	4	4	4	2	2	2	1	1	2	5	1	1	1	1	1	2	1	1	2	1	1	3	5	1	1	1	4	1	1	3	4	1
Yes	female	25	6th	3	4	2	4	4	4	2	2	2	3	3	3	5	4	4	5	3	3	3	2	2	4	2	2	4	4	2	1	5	3	2	3	4	4	3
Yes	female	21	4th	4	3	2	2	3	1	2	3	1	5	5	5	4	5	5	1	5	3	5	5	1	5	1	5	4	3	1	3	2	4	2	5	2	1	1
Yes	female	21	4th	3	3	3	3	3	3	3	3	3	3	5	5	5	4	3	4	5	5	5	5	3	1	1	3	5	5	3	4	3	1	1	4	4	5	1
Yes	female	22	4th	5	5	5	5	5	5	4	5	5	4	1	1	1	1	3	1	4	2	4	2	1	4	1	5	1	5	1	1	1	5	1	1	5	3	1
Yes	Male	24	6th	5	5	5	4	5	4	1	1	1	1	1	5	3	1	4	5	4	1	1	1	1	1	1	5	3	2	1	1	3	5	1	1	5	2	1
Yes	female	22	4th	4	5	2	4	5	2	4	5	2	3	3	3	3	3	4	4	3	3	3	3	3	3	3	3	3	3	3	3	3	3	3	3	3	3	3
Yes	female	23	4th	3	3	3	3	3	3	3	3	3	3	3	3	2	3	3	3	3	3	3	3	3	3	3	3	3	3	3	3	3	3	3	3	3	3	2
Yes	female	23	6th	5	4	4	5	4	4	4	4	4	4	4	5	3	5	5	3	3	3	3	4	4	4	4	4	4	5	3	3	3	3	4	3	3	3	3
Yes	female	25	6th	4	3	5	5	3	3	5	5	2	1	1	5	5	5	1	3	5	5	5	1	1	1	1	1	5	5	1	5	5	1	1	5	3	1	1
Yes	female	21	6th	3	5	5	5	5	5	4	5	5	1	1	3	2	1	2	1	1	1	4	1	2	3	1	1	4	2	1	1	2	1	1	1	2	4	1
Yes	female	24	6th	1	1	2	1	1	1	1	1	2	3	3	2	5	5	2	1	4	1	1	1	1	1	1	1	3	1	1	1	1	1	2	2	1	1	2
Yes	female	23	6th	5	5	5	5	5	5	5	5	5	1	1	1	1	1	1	1	1	1	1	1	1	1	1	1	5	1	1	1	1	1	1	1	1	5	1
Yes	Male	25	5th	2	1	2	2	1	1	1	1	2	4	3	3	3	3	3	2	5	3	4	3	3	5	4	2	2	3	3	3	3	4	2	3	3	5	4
Yes	Male	25	6th	3	3	2	5	4	3	3	2	2	4	2	5	4	3	2	3	4	2	2	1	2	4	3	1	2	4	2	4	2	1	1	5	4	3	4
Yes	Male	24	6th	3	2	4	5	2	2	1	1	1	2	2	2	2	4	3	1	4	4	4	4	1	2	4	1	1	2	2	2	1	1	5	1	1	1	1
Yes	Male	24	6th	4	4	5	5	1	2	5	5	5	1	1	3	1	1	1	1	1	1	3	1	1	1	1	1	4	1	1	4	1	1	1	1	1	5	1
Yes	female	22	5th	3	4	4	5	3	4	2	2	3	2	2	3	4	1	3	1	4	3	3	2	1	3	2	2	4	3	2	2	1	1	1	1	2	4	1
Yes	Male	25	6th	1	1	1	1	1	2	1	1	2	3	3	3	3	3	3	3	3	3	3	4	2	4	2	4	2	4	2	5	2	5	2	5	2	4	2
Yes	Male	23	6th	1	1	1	1	1	2	1	1	2	3	3	3	3	3	3	3	3	3	3	3	3	3	3	3	3	3	3	3	3	3	3	3	3	3	3
Yes	female	25	6th	3	4	4	4	4	4	3	3	3	3	5	3	3	5	4	3	3	3	3	3	3	3	3	3	3	3	3	3	3	3	3	3	3	3	3
Yes	Male	24	6th	4	4	5	5	5	5	5	5	5	4	2	5	4	5	3	4	5	4	5	5	1	2	1	4	5	3	1	1	5	5	1	2	1	3	1
Yes	female	24	6th	4	4	3	4	4	3	2	2	1	2	1	2	3	4	2	1	3	2	2	2	1	1	1	1	1	1	1	1	1	1	1	3	1	2	1
Yes	female	23	4th	1	1	1	1	2	1	1	2	1	3	3	3	3	3	3	3	3	3	3	3	3	3	3	3	3	3	3	3	3	3	3	3	3	3	3
Yes	female	25	6th	3	4	1	4	4	1	1	2	1	1	1	3	4	4	2	4	3	3	5	3	3	1	1	3	4	4	3	3	2	4	1	2	5	2	1
Yes	Male	24	6th	3	3	1	3	1	1	3	3	3	1	1	1	1	3	1	1	4	1	2	1	1	3	1	1	1	1	1	1	1	1	1	2	1	2	1
Yes	female	22	4th	3	4	5	4	4	5	2	2	1	2	1	1	3	2	2	2	2	1	1	2	1	2	1	1	2	2	1	2	1	1	1	1	3	2	1
Yes	female	22	4th	2	2	3	3	3	4	1	1	1	5	1	5	3	2	5	1	1	2	5	4	1	1	1	5	1	1	1	1	1	2	1	1	1	1	1
Yes	female	26	6th	5	5	5	5	5	5	5	5	5	3	3	3	3	3	3	3	3	3	3	3	3	3	3	3	3	3	3	3	3	3	3	3	3	3	3
Yes	female	25	6th	2	3	3	3	3	3	3	4	4	3	3	4	4	4	3	3	3	1	5	4	2	1	1	3	2	3	1	1	3	4	1	3	3	3	1
Yes	Male	23	6th	3	4	3	4	3	4	4	3	4	1	1	2	4	2	2	2	3	4	4	2	3	2	1	2	4	4	3	2	3	2	2	2	3	4	2
Yes	female	24	6th	3	5	5	5	3	4	5	4	5	4	2	5	4	5	4	2	5	5	5	3	5	5	1	3	4	5	1	3	5	4	1	4	1	5	1
Yes	female	23	6th	3	3	3	2	4	4	2	2	2	2	4	4	2	3	3	3	3	3	3	3	3	3	3	3	3	3	3	3	3	3	3	3	3	3	3
Yes	female	24	6th	1	1	5	3	3	5	2	2	3	2	2	3	4	2	4	1	4	3	3	2	1	5	1	2	2	2	4	2	3	3	2	3	4	3	2
Yes	female	25	6th	4	2	4	5	2	4	3	2	3	3	1	4	5	4	1	2	3	2	4	3	2	3	1	3	3	3	2	3	3	4	2	3	3	3	2
Yes	female	23	5th	3	5	5	3	4	5	3	5	5	1	1	4	3	3	2	1	3	3	4	2	2	3	1	1	5	3	1	3	1	4	1	5	3	1	3
Yes	female	22	4th	3	4	2	4	3	1	3	5	4	2	3	4	4	3	1	3	5	3	4	3	3	4	1	2	4	3	2	5	3	4	2	4	3	1	3
Yes	Male	24	6th	2	3	3	4	4	4	3	3	3	3	2	2	4	2	4	1	1	2	2	1	4	1	2	1	2	1	4	3	1	4	2	4	3	4	1
Yes	female	26	6th	5	5	5	5	5	5	2	2	2	5	5	5	5	5	5	5	5	5	5	5	5	5	5	5	5	5	5	5	5	5	5	5	5	5	5
Yes	female	21	4th	3	4	5	2	5	5	5	5	5	5	5	5	3	4	5	4	3	3	5	5	2	4	1	5	5	3	1	5	3	5	4	3	5	5	3
Yes	Male	22	4th	2	2	3	3	4	4	2	2	2	1	2	2	3	2	3	1	2	2	2	2	2	3	1	1	2	1	1	2	2	2	2	3	3	2	1
Yes	Male	24	6th	4	5	5	4	5	5	4	5	5	5	5	5	5	2	5	5	5	1	5	4	2	3	3	3	3	3	4	4	4	4	4	4	4	4	4
Yes	female	23	4th	3	3	4	3	3	4	3	3	4	3	2	1	2	1	1	1	4	4	3	1	1	1	1	1	1	2	3	2	3	4	2	1	1	1	1
Yes	female	24	6th	3	3	5	2	4	5	3	3	4	3	4	3	4	1	3	3	2	4	4	5	1	2	1	3	4	5	1	3	3	3	1	3	3	4	2
Yes	female	21	4th	3	4	5	3	3	3	3	1	3	3	3	3	3	3	1	4	4	4	2	1	3	2	1	2	3	5	1	4	5	1	5	3	4	1	1
Yes	female	25	6th	2	3	3	3	4	3	5	3	3	3	4	5	5	4	3	3	5	4	3	2	2	3	2	2	2	3	2	2	3	2	3	3	2	2	2
Yes	female	25	6th	2	2	4	5	4	4	3	3	4	1	1	4	3	3	2	1	3	3	5	4	1	5	1	1	3	2	1	1	1	1	1	1	2	2	1
Yes	female	23	4th	2	2	1	2	2	2	2	2	2	2	2	2	1	5	5	1	1	1	4	4	2	2	2	3	2	2	2	2	2	2	2	2	2	2	2
Yes	female	22	4th	1	1	1	4	4	4	5	5	5	4	1	5	1	1	1	1	5	5	5	5	2	3	1	1	3	1	2	1	2	2	1	2	2	2	1
Yes	female	24	6th	3	3	4	3	4	4	5	3	2	3	3	5	3	4	2	3	4	4	3	3	3	4	2	3	3	4	4	3	3	3	3	3	4	3	3
Yes	female	24	5th	4	5	1	5	5	5	5	5	5	1	1	5	3	5	5	1	5	5	1	4	1	5	1	5	5	3	1	5	5	5	1	1	1	5	1
Yes	Male	22	5th	3	3	3	4	4	4	5	5	5	3	3	3	1	2	1	4	1	5	5	5	5	3	5	3	5	2	4	4	5	5	5	3	5	5	5
Yes	female	23	4th	2	2	2	1	2	1	1	2	1	3	4	3	3	3	3	3	3	3	3	3	3	3	3	2	1	2	2	1	2	2	2	1	2	1	1
Yes	female	23	6th	1	1	1	2	2	2	1	2	1	3	3	3	3	3	3	3	3	3	3	3	3	3	3	3	3	3	3	3	3	3	3	3	3	3	3
Yes	Male	22	5th	3	3	4	4	3	4	4	2	2	2	1	4	3	2	1	2	4	4	3	1	3	4	2	1	4	3	1	2	4	3	2	3	1	4	2
Yes	female	25	6th	4	4	1	5	4	1	4	4	2	3	2	5	4	4	3	3	3	3	4	4	4	3	3	2	5	3	4	3	3	3	2	4	3	3	3
Yes	female	24	6th	3	3	5	2	4	4	5	4	3	2	2	4	4	4	4	2	4	5	4	2	1	2	1	2	4	4	4	4	4	4	4	2	2	3	3
Yes	Male	25	6th	2	3	5	5	5	3	1	1	1	3	1	4	3	5	5	5	5	5	5	4	4	4	3	1	4	4	2	2	1	4	3	5	4	4	1
Yes	female	24	6th	3	3	4	3	3	3	3	3	3	4	4	4	4	4	2	2	5	4	4	2	1	3	2	4	4	5	5	4	2	2	1	4	2	5	2
Yes	female	25	6th	3	4	4	3	4	5	4	3	4	3	2	1	5	3	2	1	2	5	5	3	4	4	1	2	4	4	3	2	4	2	2	3	1	5	1
Yes	female	21	6th	2	3	2	4	3	3	1	1	1	3	1	3	3	3	2	3	4	4	4	3	3	3	3	3	3	3	3	3	3	3	3	3	4	3	5
Yes	female	24	6th	3	2	4	4	4	4	1	1	1	3	1	3	4	4	4	4	3	4	4	4	2	2	3	2	3	3	3	3	3	3	3	3	3	3	3
Yes	female	23	4th	3	4	1	5	4	2	4	3	1	4	3	5	5	5	5	5	5	2	5	5	1	5	1	5	3	3	1	4	1	5	1	1	1	1	1
Yes	female	23	5th	4	4	2	5	5	5	5	4	4	3	4	4	3	3	5	3	4	4	4	2	3	4	3	2	4	4	3	4	4	4	2	3	5	3	3
Yes	female	24	6th	4	4	4	4	4	4	3	3	3	1	1	4	5	1	1	1	4	1	4	1	1	5	1	1	4	4	1	1	4	4	1	1	1	4	1
Yes	female	25	6th	3	3	1	3	3	2	3	2	2	1	1	3	5	3	1	3	1	5	3	5	3	3	1	1	5	5	5	3	5	3	1	1	5	5	5
Yes	Male	22	4th	3	3	3	3	3	3	3	4	4	4	2	3	5	2	3	3	2	1	3	3	3	3	3	3	3	3	3	3	3	3	3	3	3	3	3
Yes	Male	24	5th	4	4	5	1	1	1	1	1	1	3	4	4	4	4	3	4	3	2	4	3	4	3	2	4	4	4	3	2	4	3	4	3	4	4	3
Yes	Male	24	6th	3	3	2	1	3	2	4	3	4	4	3	3	3	3	3	4	2	4	3	2	4	3	5	5	4	4	4	3	4	3	2	1	4	3	3
Yes	Male	24	4th	3	3	2	1	3	2	3	3	1	2	3	4	5	4	3	3	1	1	3	4	1	1	1	3	3	1	1	1	1	3	1	2	1	1	1
Yes	female	25	6th	5	5	5	5	5	5	5	5	5	3	3	3	3	3	3	3	3	3	3	3	3	3	3	3	3	3	3	3	3	3	3	3	3	3	3
Yes	female	24	6th	4	3	4	4	4	4	3	3	4	3	1	4	4	4	3	1	4	1	2	5	1	4	1	1	1	1	1	1	1	1	1	3	3	1	1
Yes	female	24	4th	3	4	2	5	4	4	4	4	2	1	2	3	5	4	2	2	4	3	2	1	4	5	1	5	2	4	2	3	3	4	1	4	2	3	2
Yes	female	24	6th	2	2	3	5	4	2	4	4	2	2	3	3	4	5	3	3	3	3	3	4	3	3	3	3	3	3	3	4	3	3	2	3	3	3	3
Yes	female	21	4th	4	3	2	5	5	1	3	4	1	2	3	4	2	3	2	2	5	5	5	4	1	5	1	4	3	4	1	1	2	4	5	5	5	4	2
Yes	female	23	5th	5	5	3	5	5	3	5	5	2	5	1	5	5	5	5	5	5	5	5	5	1	4	3	5	5	5	1	1	5	5	4	5	4	5	5
Yes	female	21	4th	2	5	5	4	4	5	3	4	5	4	3	5	2	3	2	5	5	2	1	5	1	4	1	2	1	4	1	1	1	5	1	1	5	2	1
Yes	female	25	6th	3	3	1	5	3	1	5	4	3	4	3	4	3	3	3	3	2	1	1	3	3	2	3	3	3	2	2	3	3	3	3	3	3	3	3
Yes	female	23	4th	4	5	5	5	5	5	5	4	3	3	4	4	3	4	2	3	5	2	4	2	1	1	1	4	4	4	2	4	2	3	1	2	3	3	1
Yes	female	24	6th	5	4	4	5	5	5	5	5	5	5	3	3	3	3	3	3	5	3	3	3	3	3	3	3	3	3	3	3	3	3	3	3	3	3	3
Yes	female	23	6th	3	5	4	3	3	3	2	2	2	2	1	3	4	3	3	2	2	2	2	2	2	2	2	2	3	2	2	3	1	4	1	2	1	4	1
Yes	female	23	4th	2	3	1	3	3	2	2	3	1	3	1	4	4	2	2	2	5	1	3	3	3	4	3	3	1	1	1	1	1	4	1	3	5	1	1
Yes	female	22	4th	1	1	1	2	1	1	2	2	1	2	1	1	1	5	5	1	2	5	1	5	1	1	1	2	1	1	1	1	1	2	1	1	2	1	5
Yes	female	22	4th	2	1	3	4	4	3	5	2	5	2	4	5	4	5	2	5	5	5	2	2	1	1	1	1	1	3	1	1	5	1	1	5	2	5	1
Yes	Male	23	5th	3	4	4	5	4	4	5	3	4	2	3	3	4	2	4	3	4	2	4	2	3	3	3	3	3	3	3	4	4	3	4	2	2	2	2
Yes	Male	22	4th	4	5	5	5	5	5	5	5	5	1	3	5	2	5	5	5	5	1	5	5	3	5	1	5	5	4	2	5	5	5	4	1	5	5	5
Yes	female	22	4th	3	3	2	3	3	2	4	4	2	2	2	3	4	4	2	3	5	4	5	4	3	3	2	2	4	3	2	3	3	5	1	2	5	4	3
Yes	female	25	6th	3	4	5	4	4	5	3	4	5	2	1	2	3	3	2	1	3	3	3	2	2	3	1	2	3	3	2	2	1	2	2	2	2	4	2
Yes	female	21	5th	3	3	5	5	4	3	5	3	3	1	4	5	3	4	3	2	3	1	2	3	1	3	3	2	2	2	1	3	5	4	2	4	4	4	1
Yes	female	24	6th	3	4	4	5	3	3	3	2	2	1	2	4	4	4	3	3	3	4	5	4	2	2	2	4	5	4	3	5	3	5	5	4	4	5	2
Yes	Male	23	5th	4	5	5	5	4	5	4	3	3	2	4	3	5	3	1	2	4	3	2	2	3	2	2	2	2	4	3	3	3	3	3	4	2	3	1
Yes	female	22	4th	3	4	1	5	4	1	4	4	3	3	2	1	2	1	2	2	2	4	4	2	2	2	2	4	4	3	2	2	1	2	1	2	2	3	2
Yes	Male	22	4th	5	5	2	5	5	4	5	5	2	2	2	2	2	2	2	1	2	2	2	2	4	4	1	4	5	4	2	4	2	4	1	2	2	5	4
Yes	female	22	4th	4	5	5	3	5	5	4	5	5	3	4	4	5	5	4	3	4	1	1	4	1	2	1	3	4	3	1	2	1	2	3	5	5	3	5
Yes	female	22	4th	3	4	4	4	3	3	5	4	4	3	4	3	4	1	2	1	4	4	4	3	4	5	1	2	5	3	4	4	5	5	1	3	5	4	1
Yes	female	23	4th	4	5	5	3	5	5	3	3	5	3	1	4	3	3	3	2	4	3	3	2	3	3	3	2	3	4	3	3	2	3	1	4	3	3	1
Yes	female	25	6th	3	4	5	4	4	5	4	4	4	3	3	3	3	3	3	3	3	3	3	3	3	3	3	3	3	3	3	3	3	3	3	3	3	3	2
Yes	female	21	4th	4	5	5	5	5	5	5	5	5	3	2	4	3	4	4	3	4	3	4	4	2	5	1	3	3	4	2	1	3	4	1	2	5	3	2
Yes	Male	22	4th	4	3	2	5	3	2	5	4	2	1	3	3	5	1	1	4	5	4	4	1	2	3	1	1	2	4	1	5	3	4	1	1	4	4	1
